# Supplementary material for: Assessment of Helminth Biodiversity in Wild Rats Using 18S rDNA Based Metagenomics
Source: PubMed Central journal article supplement (PMC4207705; doi:10.1371/journal.pone.0110769), 2014-10-23
Supplement: pone.0110769.s001.pdf [file pone.0110769.s001.pdf]

[A]

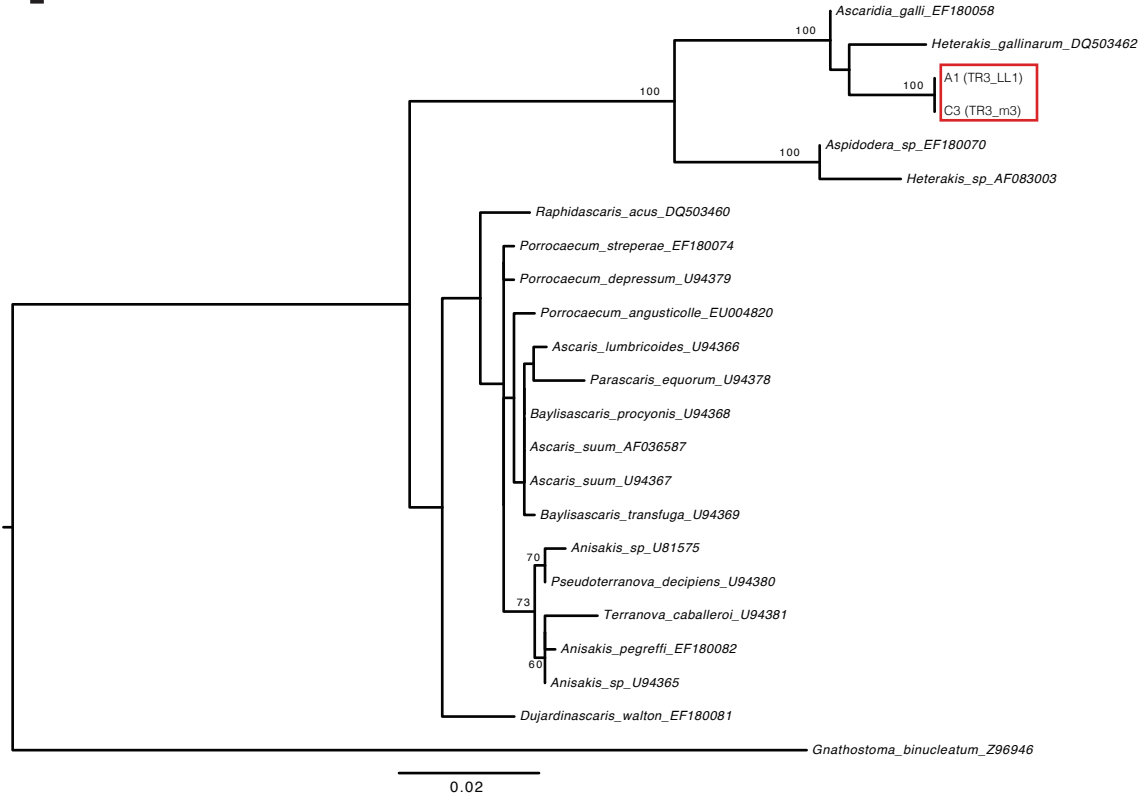

[B]

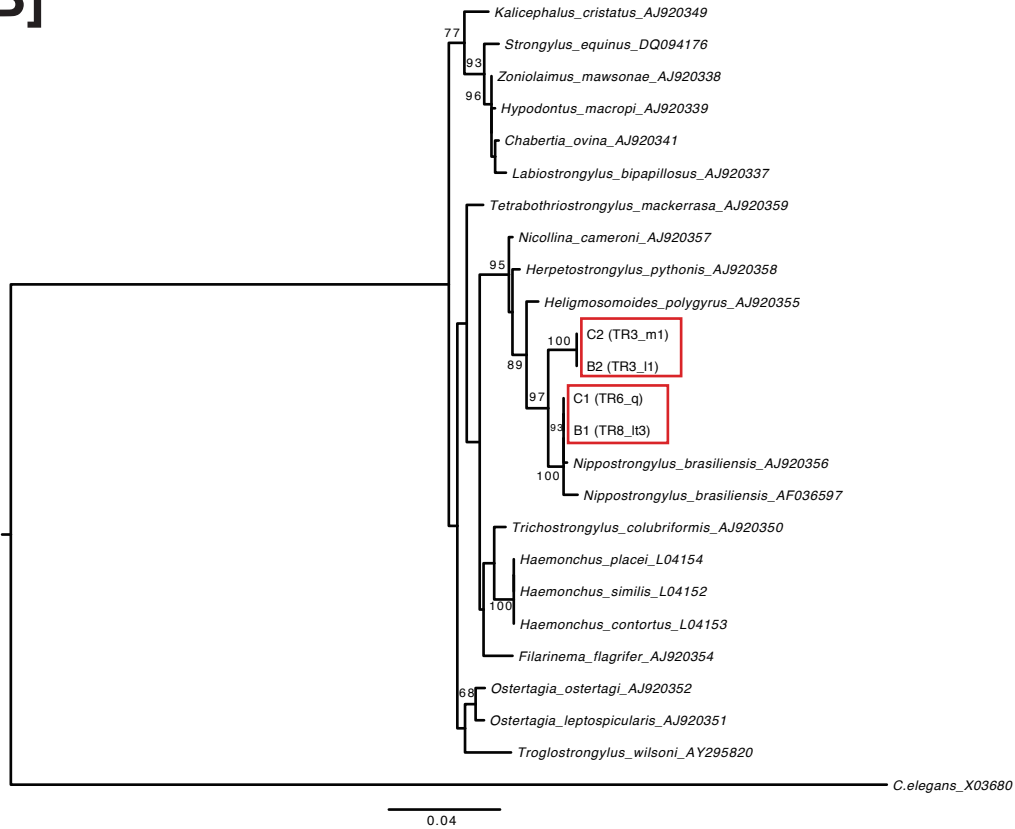

[C]

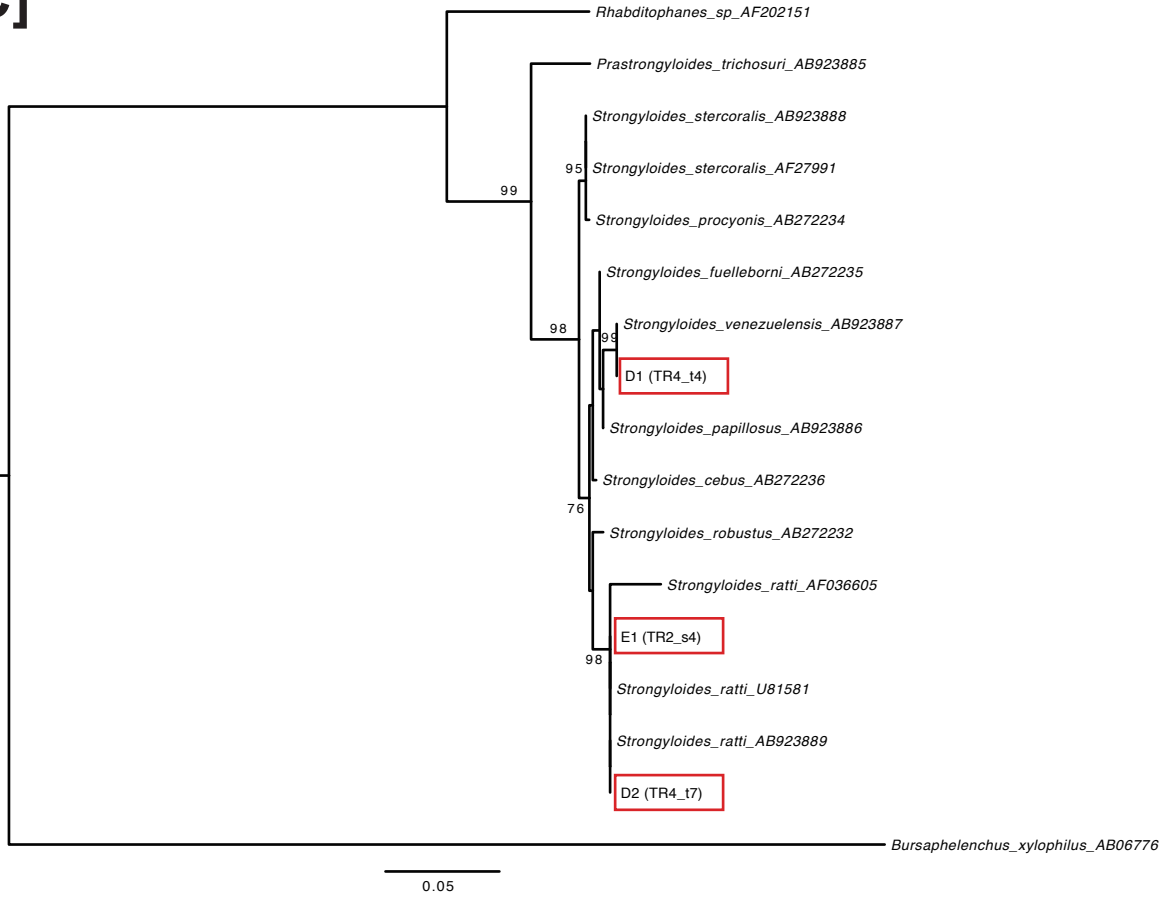

[D]

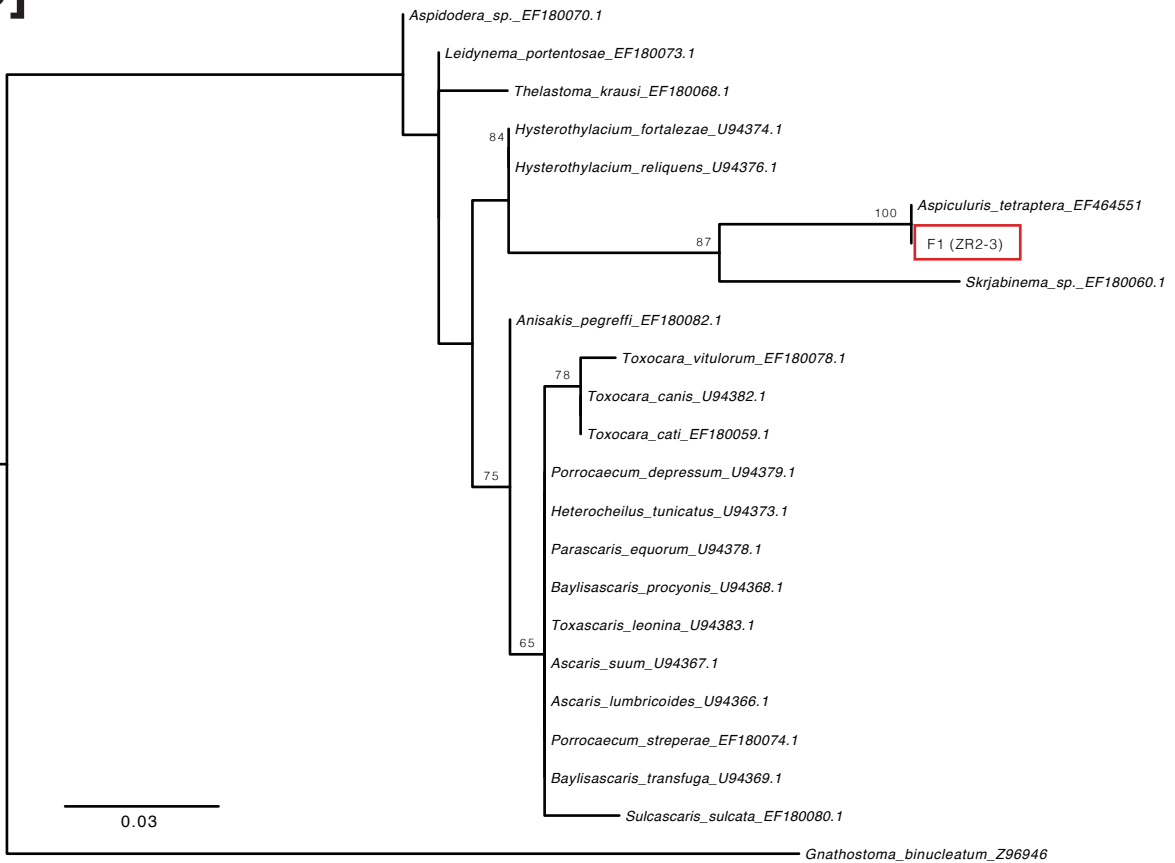

[E]

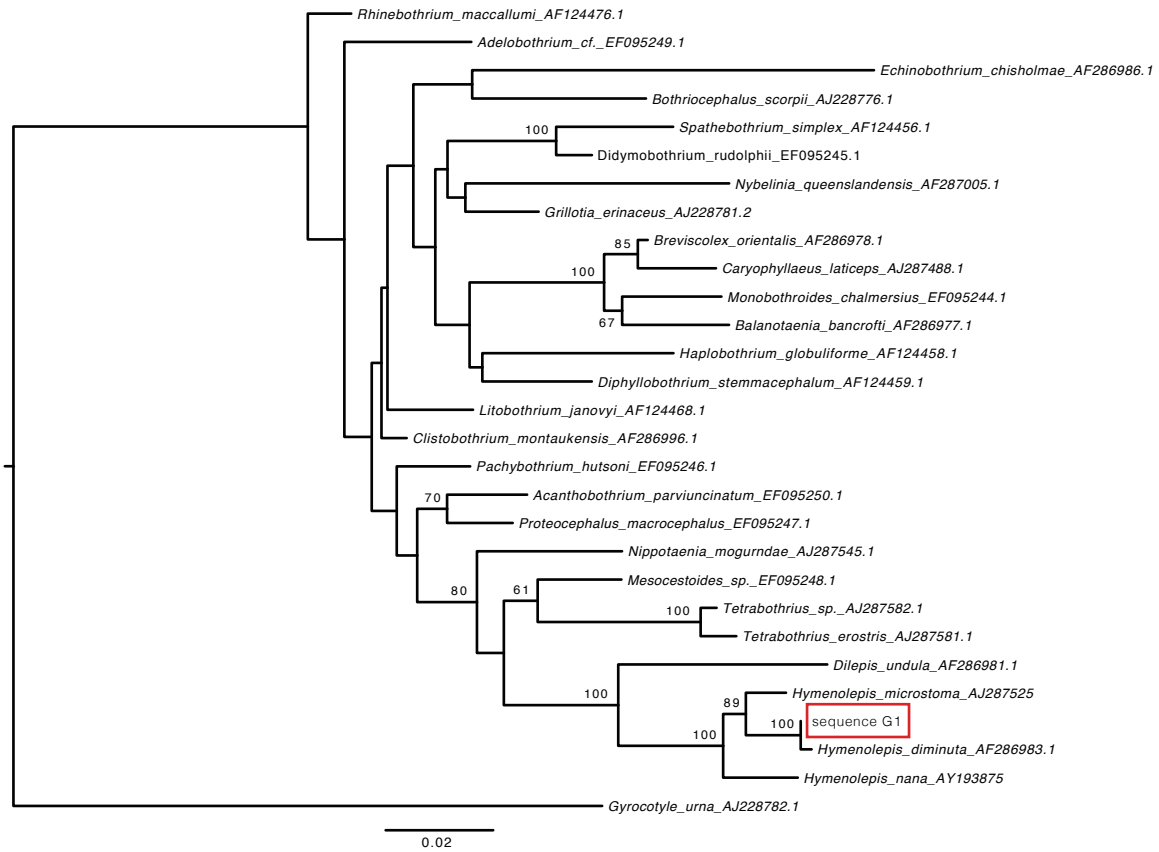

Figure S1. Maximum likelihood phylogenies based on 18S rDNA sequences to show relationships of the isolated worms with other nematode or cestode species/isolates. Selected nematode or cestode species were used in each of five trees; [A] with the sequences from morph A (A1) and morph C (C3), [B] morph B (B1, B2) and morph C (C1, C2), [C] morph D (D1, D2) and morph E (E1), [D] morph F (F1), [E] morph G (G1). Sequences obtained in this study were boxed in red, in which the sequence group IDs (shown in Table 3B) and individual sequence IDs (in parentheses) were given. Bootstrap values greater than 60% are shown on appropriate nodes. Genbank accession numbers were shown after the species names in each tip label.
